# Supplementary material for: Lysosomal trafficking mediated by Arl8b and BORC promotes invasion of cancer cells that survive radiation
Source: PubMed Central journal article supplement (PMC7591908; doi:10.1038/s42003-020-01339-9), 2020-10-27
Supplement: 42003_2020_1339_MOESM1_ESM.pdf [file 42003_2020_1339_MOESM1_ESM.pdf]

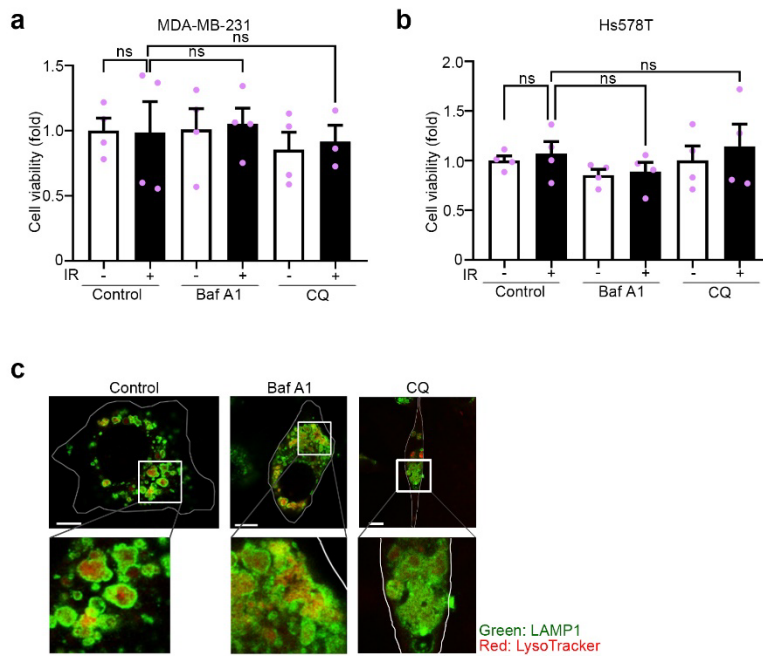

**Supplementary Fig. 1 Cell viability, as detected using the Matrigel chemoinvasion assay, is not affected by treatment with lysosome inhibitors. a, b** Cell viability of MDA-MB-231 (a) and Hs578T (b) cells after 0 Gy or 4 Gy IR treatment with or without a 12 h treatment with lysosome inhibitors (4 nM Baf A1 or 30  $\mu$ M CQ) were measured using the Cell Counting Kit-8 (CCK-8) assay. Data were collected from four independent experiments in duplicate and normalized to the control group. Columns, means (n=4); bars, SEMs. ns, not significant. **c** Immunofluorescence images of cells treated for 12 h with lysosome inhibitors. Green, LAMP1; red, LysoTracker Red DND-99. Bar, 10  $\mu$ m.

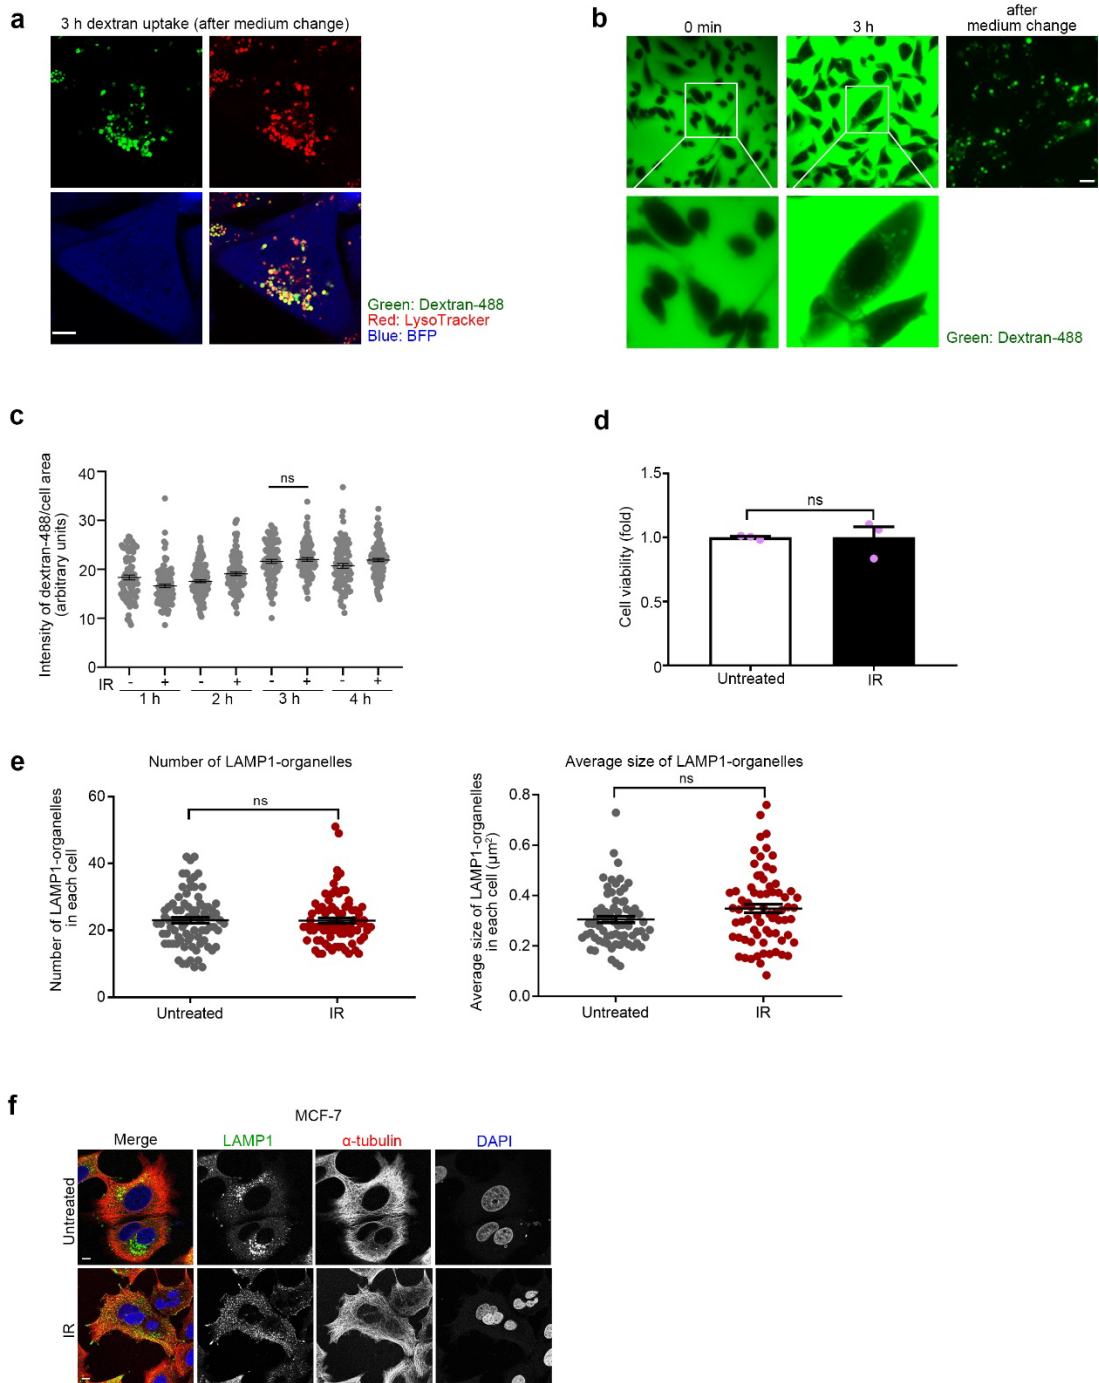

**Supplementary Fig. 2 Lysosome exocytosis was quantified by dextran-488 uptake and release.** **a** Immunofluorescence images showing the colocalization of dextran-488 and LysoTracker. Dextran-488 was incubated for 3 h, and the image was captured after a

medium change. Green, dextran-488; red, LysoTracker; blue, blue fluorescent protein (BFP, cell margin). Bar, 10  $\mu\text{m}$ . **b** Representative fluorescent images showing dextran-488 in MDA-MB-231 cells. After 3 h of incubation, the medium was replaced with dextran-488-free medium. After exchange of the media, dextran-488 uptake into the cells was observed. **c** Fluorescence intensities of dextran-488 in MDA-MB-231 cells with or without 4 Gy IR treatment were normalized to each cell area. More than 20 cells per group were assessed in three independent experiments, and the results are shown as a scatter plot. Bars, SEMs. ns, not significant. **d** Cell viability in MDA-MB-231 cells with or without 4 Gy IR treatment during exocytosis assay was measured using the CCK-8 assay. Columns, means (n=3); bars, SEMs. ns, not significant. **e** Number and average size of LAMP1-organelles in each cell of MDA-MB-231 with or without IR treatment. More than 20 cells per group were assessed in three independent experiments, and the results are shown as a scatter plot. Bars, SEMs. ns, not significant. **f** Individual channels of the immunofluorescence images shown in Fig. 1i. Green, LAMP1; red,  $\alpha$ -tubulin; blue, DAPI. Bar, 10  $\mu\text{m}$ .

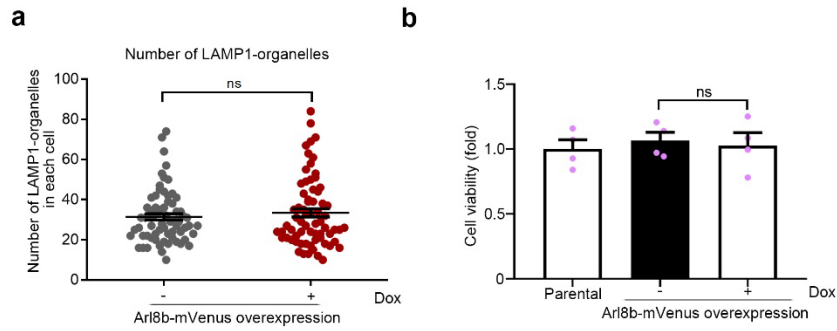

**Supplementary Fig. 3 Arl8b overexpression MDA-MB-231 cells. a** Arl8b-mVenus overexpression was induced by doxycycline. The number of lysosomes in Arl8b-mVenus-overexpression cells was calculated. More than 20 cells per group were assessed in three independent experiments, and the results are shown as a scatter plot. Bars, SEMs. ns, not significant. **b** Cell viability in MDA-MB-231 cells stably overexpressing Arl8b-mVenus was measured by CCK-8 assay. Dox, doxycycline. Columns, means (n=4); bars, SEMs. ns, not significant.

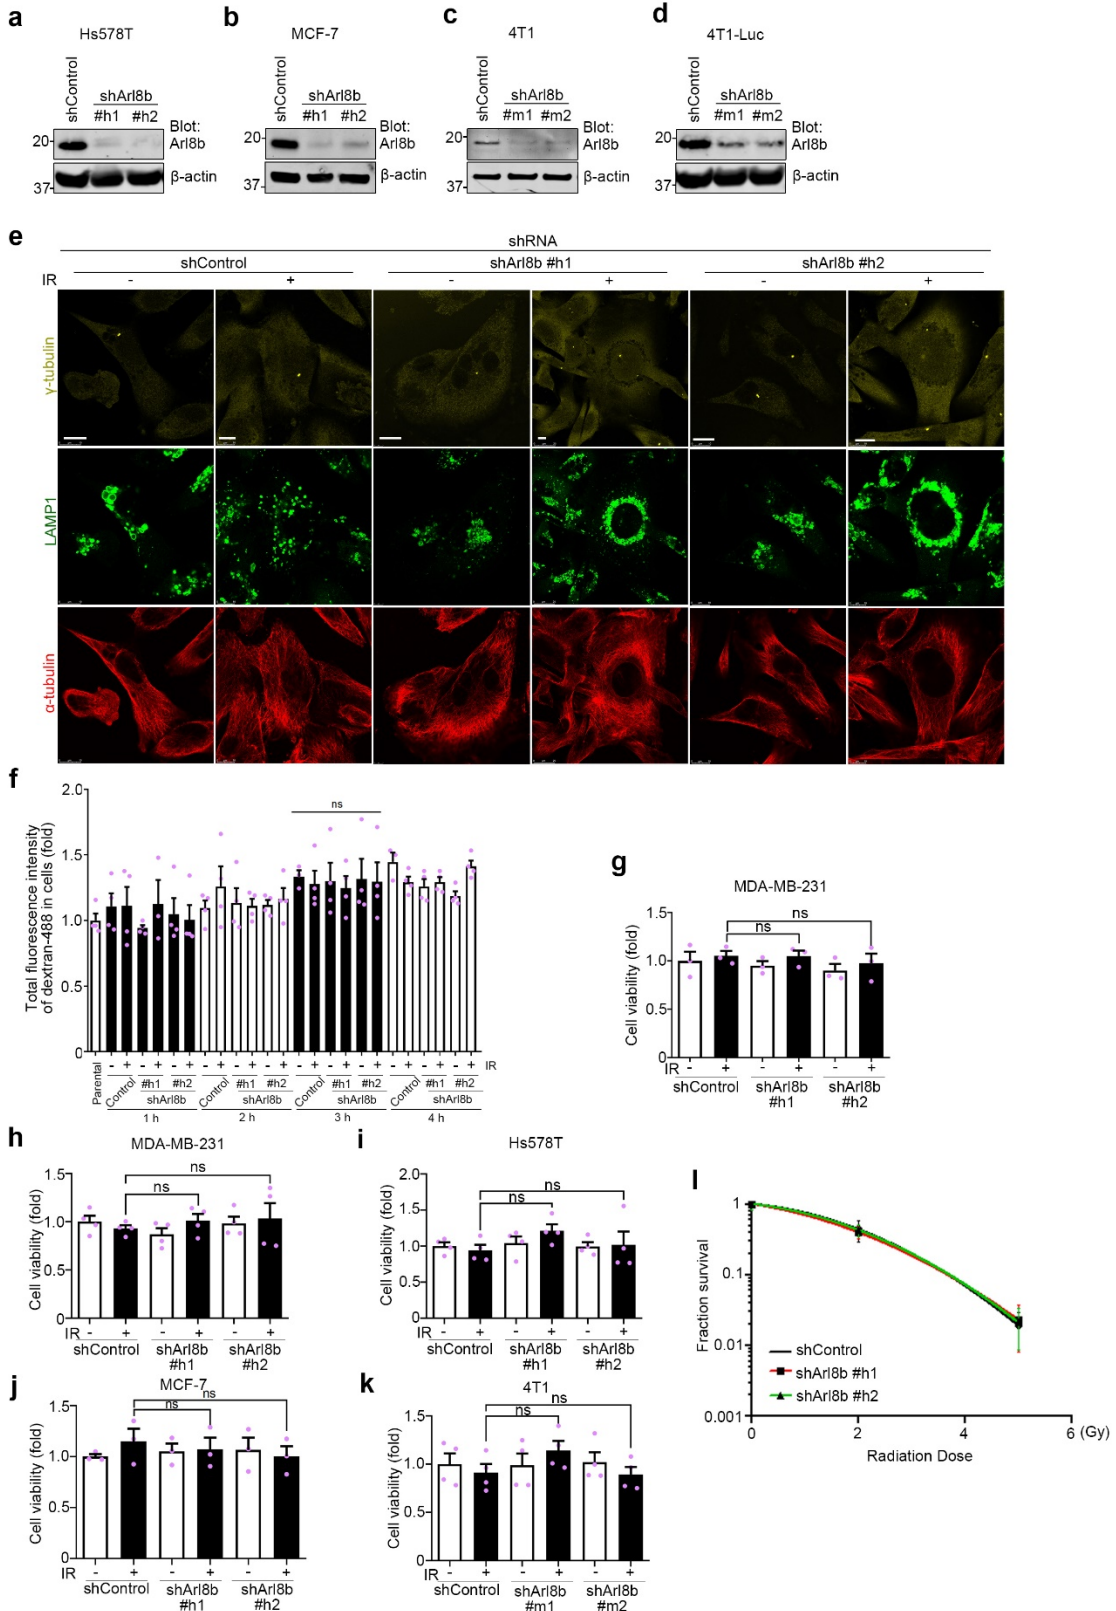

**Supplementary Fig. 4 Effects of Arl8b knockdown on breast cancer cells. a-d** Arl8b was knocked down using shRNA human #1 and human #2 in Hs578T cells (a) and MCF-7 cells (b); knocked down using shRNA mouse #1 and mouse #2 in 4T1 cells (c) and 4T1-Luc cells (d). Arl8b protein expression was detected by immunoblotting. **e** Individual channels of the immunofluorescence images shown in Fig. 4b. Yellow,  $\gamma$ -tubulin (centrosome); green, LAMP1; red,  $\alpha$ -tubulin. Bar, 10  $\mu$ m. **f** Knockdown of Arl8b does not affect dextran-488 uptake in cells in an exocytosis assay. The fluorescence intensity of dextran-488 in MDA-MB-231 cells was measured by plate reader after medium change to Dextran-free PBS. Columns, means (n=3); bars, SEMs. ns, not significant. **g** Knockdown of Arl8b does not affect cell viability in an exocytosis assay (Fig. 4e). Cell viability in control or Arl8b-knockdown MDA-MB-231 cells with or without 4 Gy IR treatment during exocytosis assay was measured by CCK-8 assay. Columns, means (n=3); bars, SEMs. ns, not significant. **h-k** Knockdown of Arl8b does not affect cell viability in MDA-MB-231 (h), Hs578T (i) MCF-7 (j) and 4T1 (k) cells during the invasion assay (Fig. 4h-k). Cell viability in control or Arl8b-knockdown MDA-MB-231 cells with or without 4 Gy IR treatment during invasion assay was measured using the CCK-8 assay. Columns, means; bars, SEMs. ns, not significant. **l** Cell survival curves of control or Arl8b-knockdown MDA-MB-231 cells after IR were measured by colony formation assay. Arl8b did not involve in the radiosensitivity of MDA-MB-231 cells. Fractional survival is shown on a log axis, means (n=4); bars, SEMs.

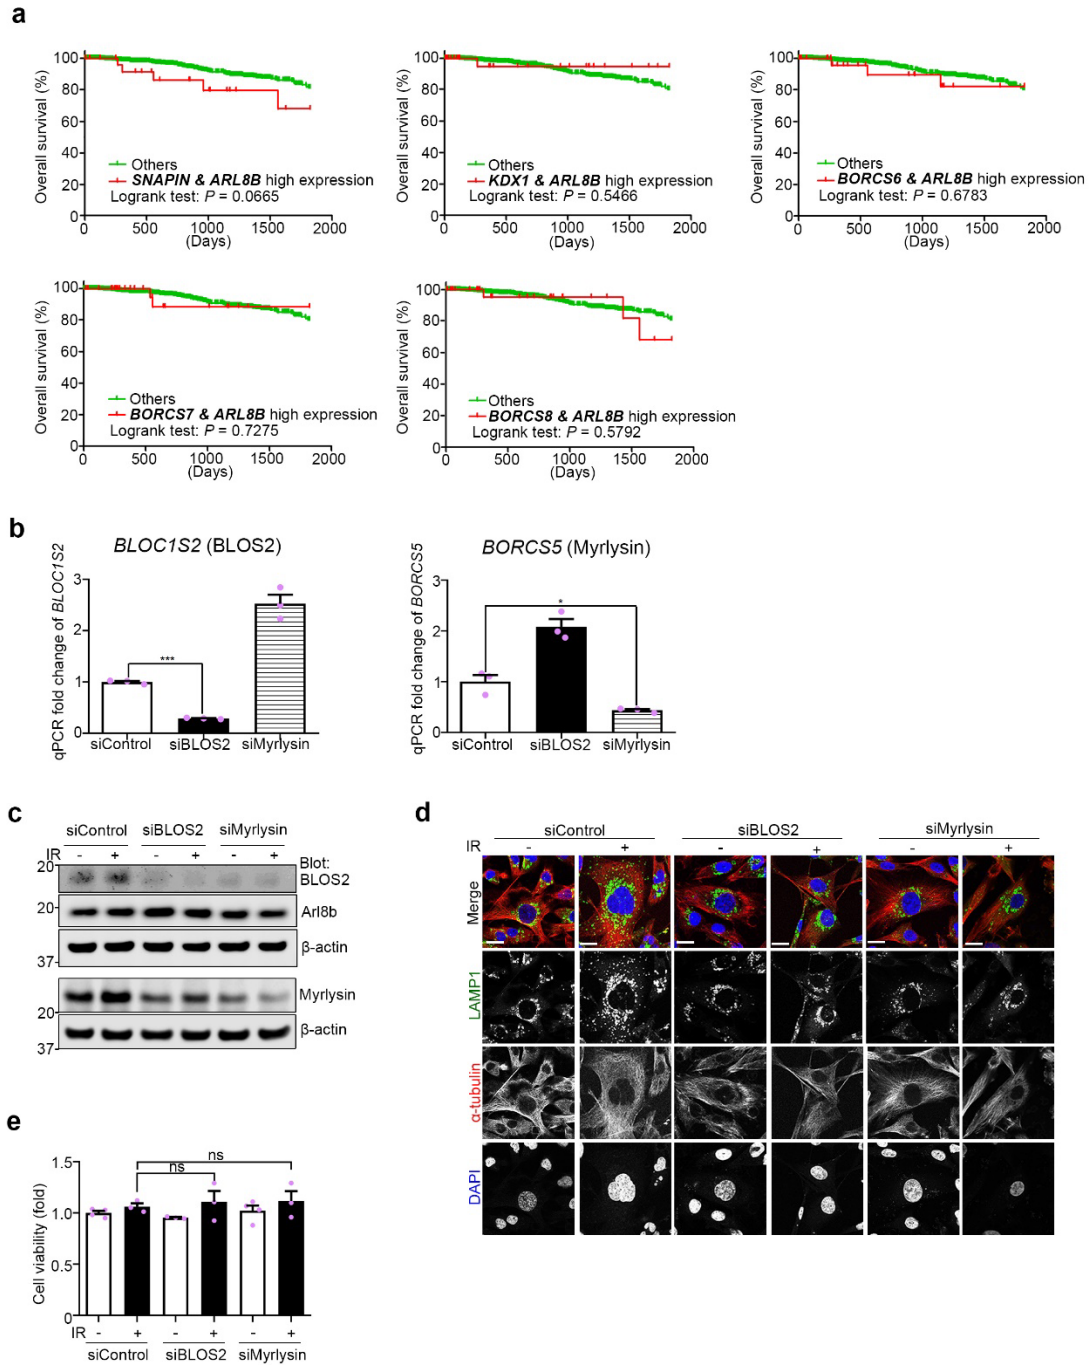

**Supplementary Fig. 5 BORC-subunits.** **a** Kaplan-Meier survival analysis based on the expression levels of *ARL8B* and BORC subunits. **b** MDA-MB-231 cells were transfected with siRNAs against BLOS2 or Myrlysin, and changes in expression were confirmed by qPCR. GAPDH was used as an internal control. Columns, means (n=3); bars, SEMs. \*, *P*

< 0.01, \*\*\*,  $P < 0.001$ . **c** Protein levels of BLOS2 and Myrlysin were suppressed by knockdown of either Myrlysin or BLOS2. The BLOS2 and Myrlysin protein expression levels were detected by western blotting. **d** Individual channels of the immunofluorescence images shown in Fig. 5f. Green, LAMP1; red,  $\alpha$ -tubulin; blue, DAPI. Bar, 20  $\mu$ m. **e** Cell viability in MDA-MB-231 cells following the siRNA-mediated knockdown of BLOS2 or Myrlysin treated with or without 4 Gy IR used during the invasion assay was measured by CCK-8 assay. Columns, means (n=3); bars, SEMs. ns, not significant.



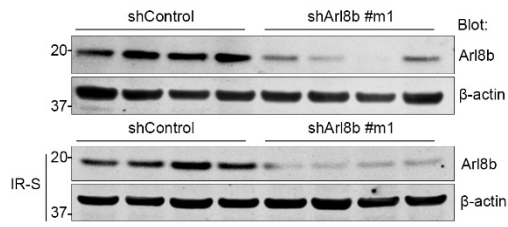

**Supplementary Fig. 6 Protein levels of Arl8b in *in vivo* tumors were suppressed by shRNA knockdown.** Arl8b protein expression in *in vivo* tumors was detected by immunoblotting.

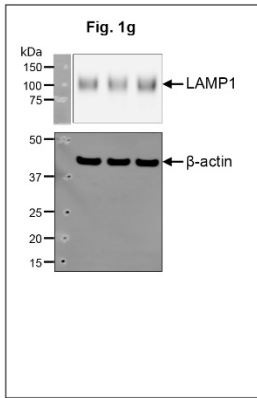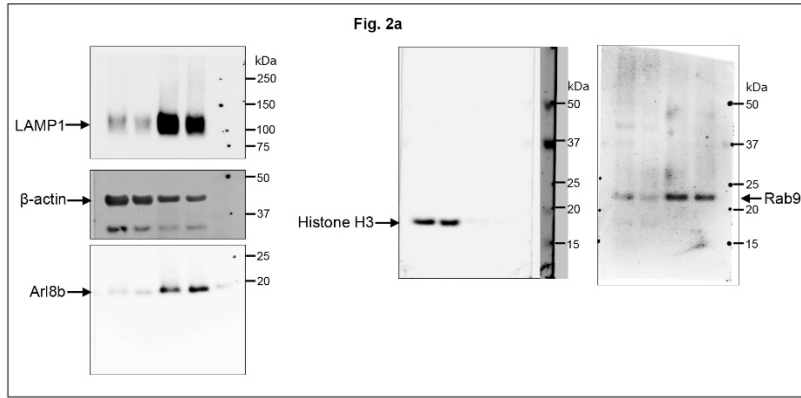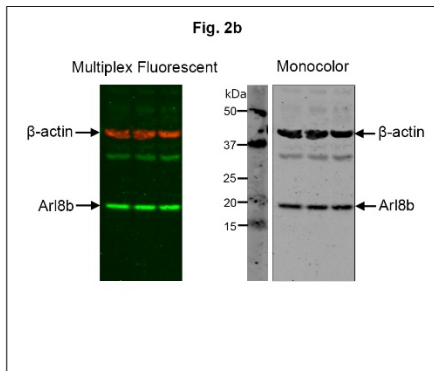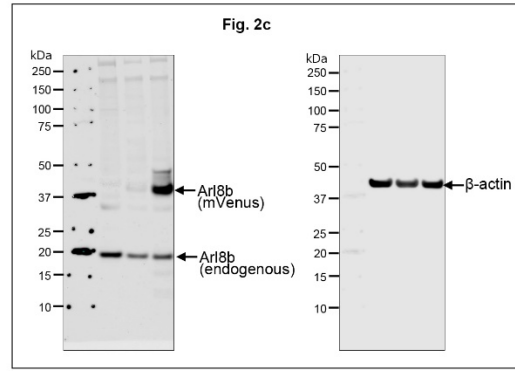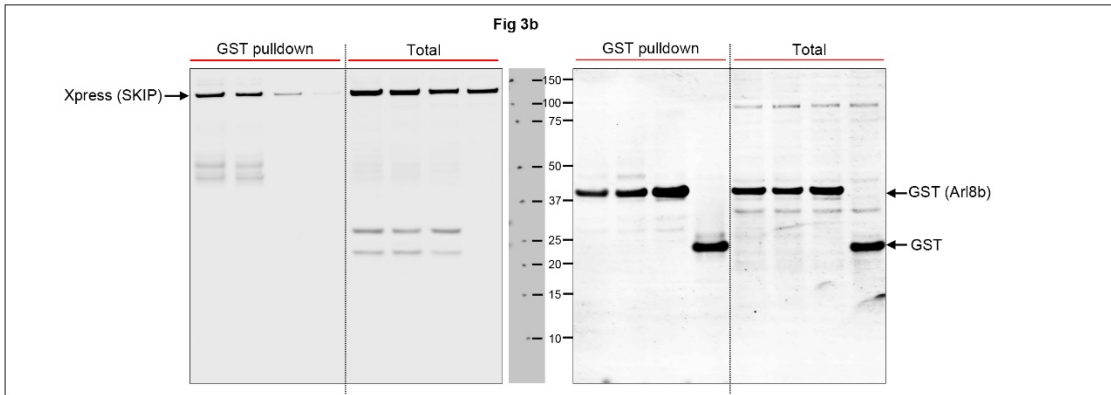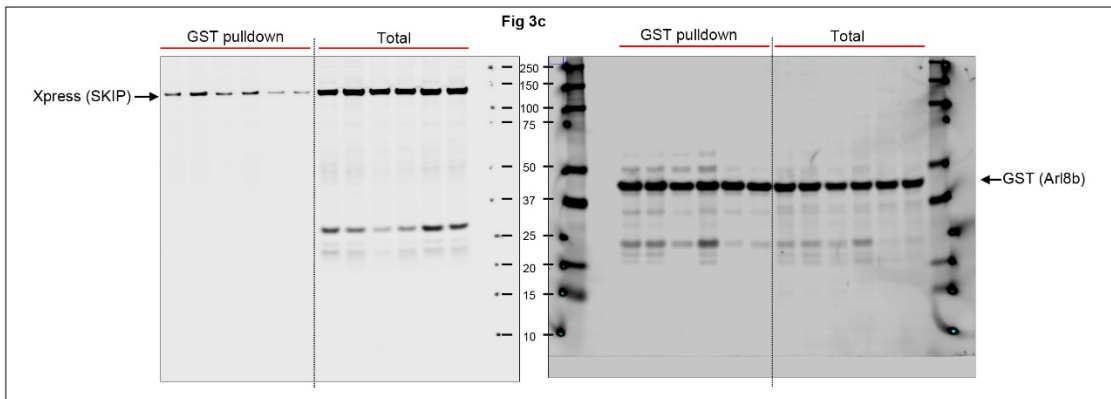

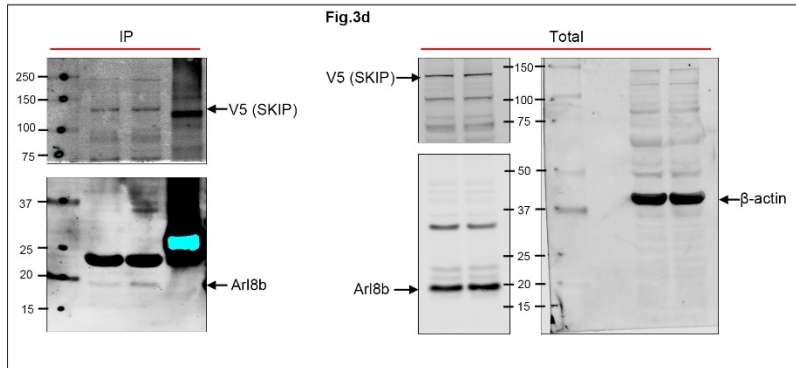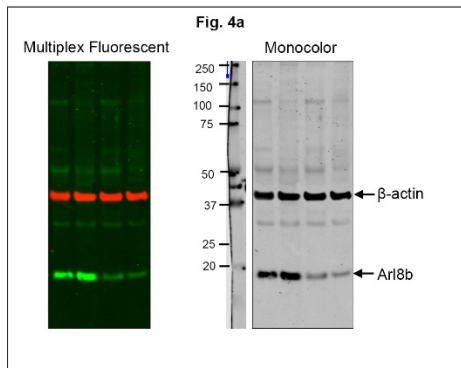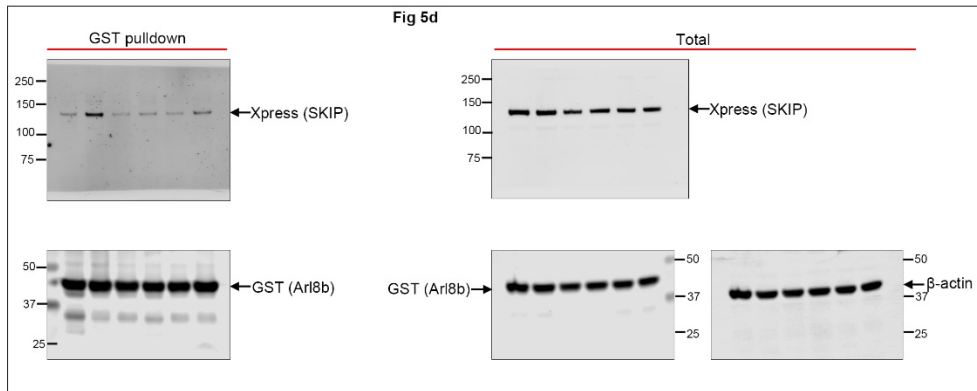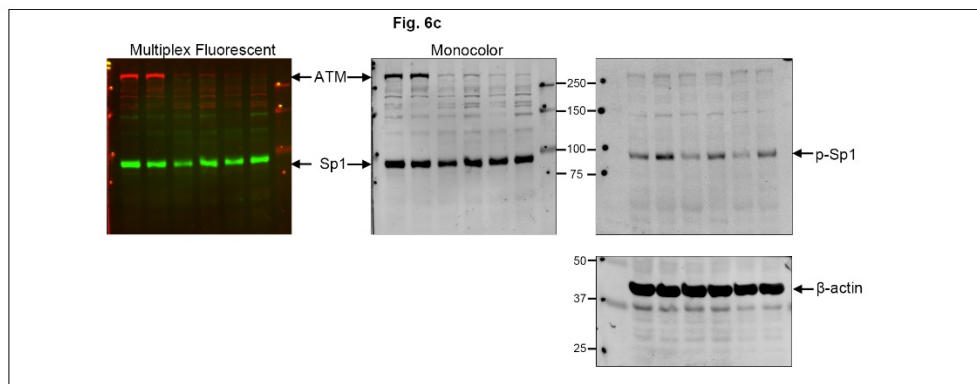

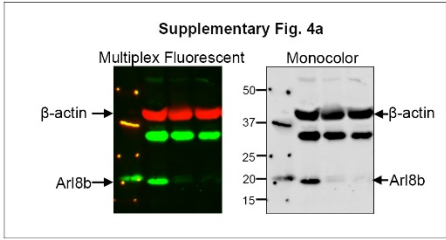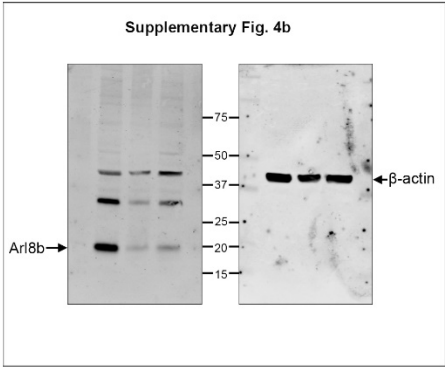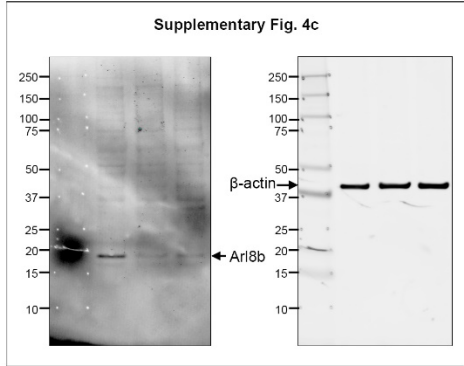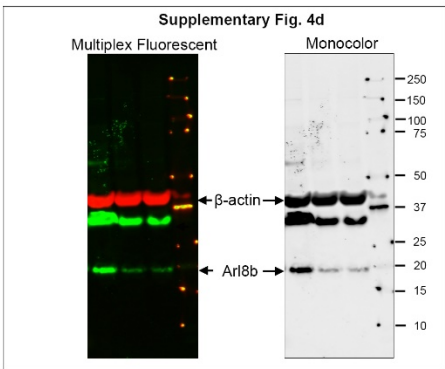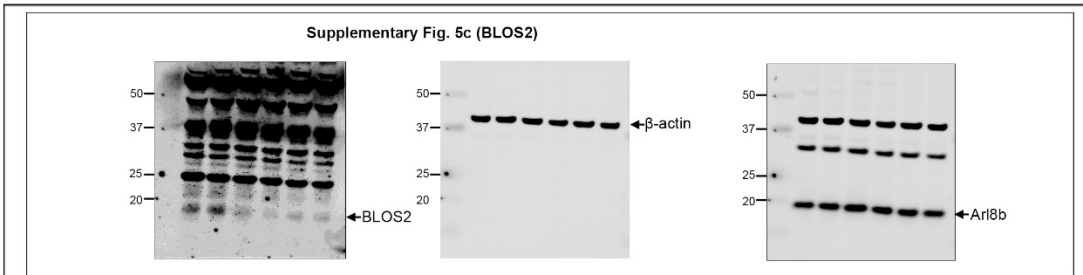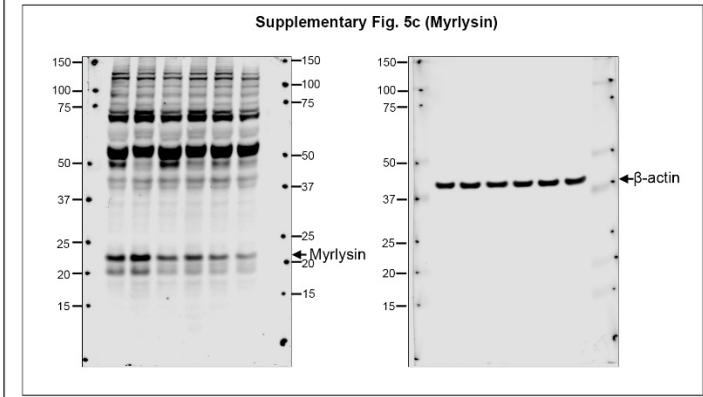

Supplementary Fig. 6

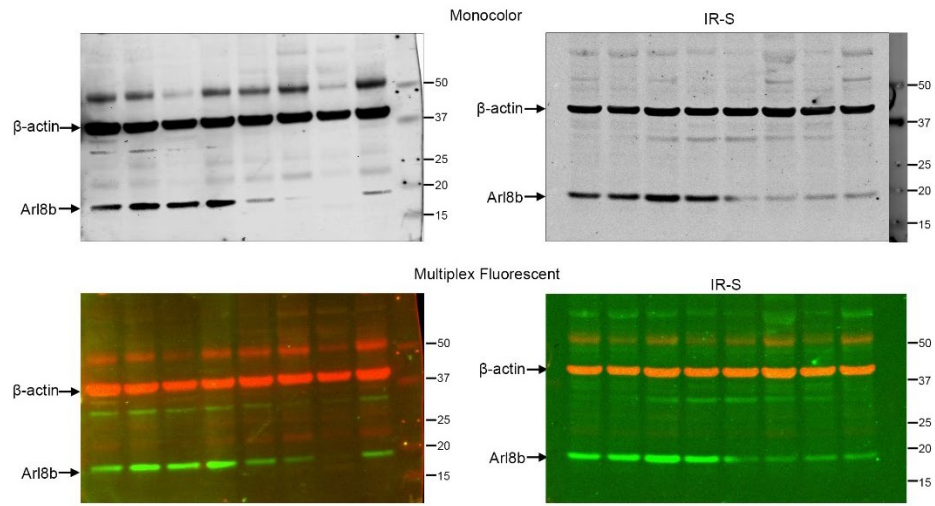

Supplementary Fig. 7 Uncropped scans of western blots.

**Supplementary Table 1. List of antibodies**

| <b>Target</b>                      | <b>Company</b>                                      | <b>Catalog</b> | <b>Host</b> | <b>Application/<br/>dilution</b> |
|------------------------------------|-----------------------------------------------------|----------------|-------------|----------------------------------|
| Arl8b                              | Proteintech (Rosemont, USA)                         | 13049-1-AP     | Rabbit      | WB (1:1000)                      |
| ATM                                | Sigma-Aldrich                                       | A1106-25UL     | Mouse       | WB (1:1000)                      |
| BLOC1S2                            | Abnova (Taipei, Taiwan)                             | H00282991-M01  | Mouse       | WB (1:500)                       |
| Cathepsin B (D1C7Y)                | Cell Signaling Technology                           | #31718s        | Rabbit      | IF (1:400)                       |
| Cathepsin D                        | Abcam                                               | ab134169       | Rabbit      | IF (1:400)                       |
| GST tag (EPR4236)                  | Abcam                                               | ab111947       | Rabbit      | WB (1:2000)<br>IF (1:400)        |
| HA tag                             | Medical and Biological Laboratories                 | M180-3         | Mouse       | IF (1:400)                       |
| Histone H3 (MABI0301)              | Medical and Biological Laboratories (Nagoya, Japan) | 300-34783      | Mouse       | WB (1:1000)                      |
| Ki67 (D3B5)                        | Cell Signaling Technology                           | #12202         | Rabbit      | IHC (1:400)                      |
| LAMP1                              | Cell Signaling Technology                           | #9091          | Rabbit      | WB (1:1000)<br>IF (1:400)        |
| LOH12CR1 (Myrlysin)                | Proteintech                                         | 17169-1-AP     | Rabbit      | WB (1:500)                       |
| MMP3 (D7f5b)                       | Cell Signaling Technology                           | #14351T        | Rabbit      | IF (1:400)                       |
| MT1-MMP (D1E4)                     | Cell Signaling Technology                           | #13130         | Rabbit      | IF (1:400)                       |
| p-Sp1 (Ser101)                     | Active Motif (Carlsbad, USA)                        | 39758          | Rabbit      | WB (1:1000)                      |
| Rab9                               | Cell Signaling Technology                           | #5118          | Rabbit      | WB (1:1000)                      |
| Sp1 (D4C3)                         | Cell Signaling Technology                           | #9389          | Rabbit      | WB (1:1000)<br>ChIP              |
| V5 tag                             | Thermo Fisher Scientific                            | R960-25        | Mouse       | WB (1:1000)                      |
| V5 tag (D3H8Q)                     | Cell Signaling Technology                           | #13202         | Rabbit      | WB (1:1000)                      |
| Xpress tag                         | Thermo Fisher Scientific                            | R910-25        | Mouse       | WB (1:1000)<br>IF (1:400)        |
| $\alpha$ -tubulin                  | Cell Signaling Technology                           | #3873          | Mouse       | IF (1:400)                       |
| $\beta$ -actin                     | Sigma-Aldrich                                       | A5441          | Mouse       | WB (1:5000)                      |
| $\beta$ -actin                     | Cell Signaling Technology                           | #4970          | Rabbit      | WB (1:5000)                      |
| $\gamma$ -tubulin-Alexa Fluor® 647 | Abcam (Cambridge, UK)                               | ab191114       | Mouse       | IF (1:400)                       |

**Supplementary Table 2. List of sequences**

|                                                            |                            |                            |
|------------------------------------------------------------|----------------------------|----------------------------|
| shRNA                                                      | Sequence (5'-3')           |                            |
| Scrambled control                                          | ATCTCGCTTGGGCGAGAGTAAG     |                            |
| Arl8b #h1                                                  | GCTGAAGATGAATATCCCTAA      |                            |
| Arl8b #h2                                                  | AGGTAACGTCACAATAAAGAT      |                            |
| Arl8b #m1                                                  | CGAGGAGTCAATGCAATTGTT      |                            |
| Arl8b #m2                                                  | GCCTCTCGAAATGAACTGCAT      |                            |
| siRNA                                                      | Sequence (5'-3')           |                            |
|                                                            | Sense                      | Antisense                  |
| Scrambled control                                          | GUUUUAUUGACAAGUUAAGAdTdT   | UCUUAACUUGUCAAUAAACdTdT    |
| BLOS2                                                      | GAUCGGAAUGGUGGAGAACUudTdT  | AAGUUCUCCACCAUUC CGAUCdTdT |
| Myrlysin                                                   | GACCAGAAUGCUUUGGUUAAAdTdT  | UUUAACCAAAGCAUUCUGGUCdTdT  |
| Sp1 #1                                                     | AAUGAGAACAGCAACAACUCCdTdT  | GGAGUUGUUGCUGUUCUCAUudTdT  |
| Sp1 #2                                                     | GAGUCACCCAAUGAGAACAdTdT    | UGUUCUCAUUGGGUGACUCdTdT    |
| ATM #1                                                     | CAUCUAGAUCGGCAUUCAGdTdT    | CUGAAUGCCGAUCUAGAUGdTdT    |
| ATM #2                                                     | GCCUCCAAUUCUUCACAGUAAAdTdT | UUACUGUGAAGAAUUGGAGGCdTdT  |
| qPCR primers                                               | Sequence (5'-3')           |                            |
|                                                            | Forward                    | Reverse                    |
| <i>GAPDH</i>                                               | ACAAC TTTGGTATCGTGGAAGG    | GCCATCACGCCACAGTTTC        |
| 18S rRNA                                                   | TCGGA ACTGAGGCCATGATT      | CCTCCGACTTTCGTTCTTGATT     |
| <i>BLOCIS2</i>                                             | AGCTGAGGAAGCAAAGGAGCCT     | CCAGGAGCTTATAGTCTTCACTG    |
| <i>BORCS5</i>                                              | GCCGTTGCTTTTGACCAGAATGC    | TGCTCGGCATACTTGGCATC       |
| <i>SPI</i>                                                 | ACGCTTCACACGTTCCGGATGAG    | TGACAGGTGGTCACTCCTCATG     |
| Negative control for ChIP-qPCR (Chromosome 13 gene desert) | TTTTGACCTACCGTTGCTGA       | TCATCTCACCTTGGGTTCACATT    |
| <i>BLOCIS2</i> promoter (-1237/-1108)                      | GCTCCTGGACACCCAAAATCT      | GGGTGGAGACAGTCAGGGTA       |
| <i>BORCS5</i> promoter (-669/-518)                         | GAGAACGCTAGAGCCAGCTAAC     | GGGACCTTGGCAGTTATCAACA     |

**Supplementary Table 3. P-value**

| Figure 1a         |            |             |                |
|-------------------|------------|-------------|----------------|
| <i>t</i> -test    |            | Significant | <i>P</i> value |
| Control           | Control IR | **          | 0.009          |
| Baf A1            | Baf A1 IR  | ns          | 0.6033         |
| CQ                | CQ IR      | ns          | 0.2994         |
| Control IR        | Baf A1 IR  | **          | 0.0011         |
| Control IR        | CQ IR      | **          | 0.0022         |
| Figure 1b         |            |             |                |
| <i>t</i> -test    |            | Significant | <i>P</i> value |
| Control           | Control IR | *           | 0.0100         |
| Baf A1            | Baf A1 IR  | ns          | 0.4674         |
| CQ                | CQ IR      | ns          | 0.5841         |
| Control IR        | Baf A1 IR  | **          | 0.002          |
| Control IR        | CQ IR      | **          | 0.0013         |
| Figure 1c         |            |             |                |
| <i>t</i> -test    |            | Significant | <i>P</i> value |
| Untreated         | IR         | **          | 0.0059         |
| Figure 1d         |            |             |                |
| <i>t</i> -test    |            | Significant | <i>P</i> value |
| Untreated         | IR         | *           | 0.0411         |
| Figure 1e         |            |             |                |
| <i>t</i> -test    |            | Significant | <i>P</i> value |
| Untreated         | IR         | *           | 0.0463         |
| Figure 1j         |            |             |                |
| Mann-Whitney test |            | Significant | <i>P</i> value |
| Untreated         | IR         | ***         | <0.001         |
| Figure 1k         |            |             |                |
| <i>t</i> -test    |            | Significant | <i>P</i> value |
| Untreated         | IR         | *           | 0.0268         |
| Figure 1n         |            |             |                |
| Mann-Whitney test |            | Significant | <i>P</i> value |
| Untreated         | IR         | *           | 0.0371         |
| Figure 2a         |            |             |                |
| <i>t</i> -test    |            | Significant | <i>P</i> value |
| Untreated         | IR         | *           | 0.0258         |
| Figure 2b         |            |             |                |
| <i>t</i> -test    |            | Significant | <i>P</i> value |
| 0Gy               | 4Gy        | ns          | 0.4112         |
| 0Gy               | 8Gy        | ns          | 0.6459         |
| Figure 2g         |            |             |                |
| Mann-Whitney test |            | Significant | <i>P</i> value |
| Dox -             | Dox +      | ***         | <0.001         |
| Figure 2h         |            |             |                |



| <i>t</i> -test    |                | Significant | <i>P</i> value |
|-------------------|----------------|-------------|----------------|
| Dox -             | Dox +          | *           | 0.0373         |
| Figure 3c         |                |             |                |
| <i>t</i> -test    |                | Significant | <i>P</i> value |
| WT                | WT IR          | **          | 0.0085         |
| Figure 4d         |                |             |                |
| Mann-Whitney test |                | Significant | <i>P</i> value |
| shControl IR      | shArl8b #h1 IR | ***         | <0.001         |
| shControl IR      | shArl8b #h2 IR | ***         | <0.001         |
| Figure 4e         |                |             |                |
| <i>t</i> -test    |                | Significant | <i>P</i> value |
| shControl IR      | shArl8b #h1 IR | *           | 0.0464         |
| shControl IR      | shArl8b #h2 IR | *           | 0.0375         |
| Figure 4f         |                |             |                |
| <i>t</i> -test    |                | Significant | <i>P</i> value |
| shControl IR      | shArl8b #h1 IR | *           | 0.0127         |
| shControl IR      | shArl8b #h2 IR | *           | 0.0124         |
| Figure 4g         |                |             |                |
| <i>t</i> -test    |                | Significant | <i>P</i> value |
| shControl IR      | shArl8b #h1 IR | *           | 0.0101         |
| shControl IR      | shArl8b #h2 IR | *           | 0.0377         |
| Figure 4h         |                |             |                |
| <i>t</i> -test    |                | Significant | <i>P</i> value |
| shControl         | shControl IR   | *           | 0.0150         |
| shControl IR      | shArl8b #h1 IR | *           | 0.0105         |
| shControl IR      | shArl8b #h2 IR | *           | 0.0481         |
| Figure 4i         |                |             |                |
| <i>t</i> -test    |                | Significant | <i>P</i> value |
| shControl         | shControl IR   | *           | 0.0185         |
| shControl IR      | shArl8b #h1 IR | **          | 0.0044         |
| shControl IR      | shArl8b #h2 IR | *           | 0.0323         |
| Figure 4j         |                |             |                |
| <i>t</i> -test    |                | Significant | <i>P</i> value |
| shControl         | shControl IR   | *           | 0.0253         |
| shControl IR      | shArl8b #h1 IR | *           | 0.0397         |
| shControl IR      | shArl8b #h2 IR | *           | 0.0177         |
| Figure 4k         |                |             |                |
| <i>t</i> -test    |                | Significant | <i>P</i> value |
| shControl         | shControl IR   | *           | 0.0225         |
| shControl IR      | shArl8b #m1 IR | *           | 0.0496         |
| shControl IR      | shArl8b #m2 IR | *           | 0.0299         |
| Figure 4m         |                |             |                |
| Mann-Whitney test |                | Significant | <i>P</i> value |
| shControl IR      | shArl8b #h1 IR | *           | 0.0113         |
| shControl IR      | shArl8b #h2 IR | ***         | <0.001         |

| Figure 5a                    |                  |             |         |
|------------------------------|------------------|-------------|---------|
| Logrank test                 |                  | Significant | P value |
| <i>ARL8B</i>                 | Others           | **          | 0.0058  |
| <i>BLOC1S1/ARL8B</i>         | Others           | *           | 0.0253  |
| <i>BLOC1S2/ARL8B</i>         | Others           | ***         | <0.001  |
| <i>BORCS5/ARL8B</i>          | Others           | *           | 0.0454  |
| Figure 5b                    |                  |             |         |
| Brunner-Munzel test          |                  | Significant | P value |
| <i>BLOC1S2/ARL8B</i>         | Others           | *           | 0.0326  |
| Figure 5d                    |                  |             |         |
| t-test                       |                  | Significant | P value |
| siControl IR                 | siBLOS2 IR       | *           | 0.0498  |
| Figure 5h                    |                  |             |         |
| Mann-Whitney test            |                  | Significant | P value |
| siControl IR                 | siBLOS2 IR       | *           | 0.0257  |
| siControl IR                 | siMyrlysin IR    | *           | 0.0304  |
| Figure 5i                    |                  |             |         |
| t-test                       |                  | Significant | P value |
| siControl                    | siControl IR     | *           | 0.0265  |
| siControl IR                 | siBLOS2 IR       | *           | 0.0326  |
| siControl IR                 | siMyrlysin IR    | *           | 0.0204  |
| Figure 6a                    |                  |             |         |
| t-test                       |                  | Significant | P value |
| siControl                    | siSp1 #1         | **          | 0.0025  |
| siControl                    | siSp1 #2         | **          | 0.0027  |
| Figure 6b ( <i>BLOC1S2</i> ) |                  |             |         |
| t-test                       |                  | Significant | P value |
| siControl IR                 | siSp1 #1 IR      | **          | 0.0069  |
| siControl IR                 | siSp1 #2 IR      | **          | 0.0034  |
| Figure 6b ( <i>BORCS5</i> )  |                  |             |         |
| t-test                       |                  | Significant | P value |
| siControl IR                 | siSp1 #1 IR      | ***         | <0.001  |
| siControl IR                 | siSp1 #2 IR      | **          | 0.0074  |
| Figure 6d ( <i>BLOC1S2</i> ) |                  |             |         |
| t-test                       |                  | Significant | P value |
| Anti-Sp1                     | Anti-Sp1 IR      | *           | 0.0430  |
| Figure 6d ( <i>BORCS5</i> )  |                  |             |         |
| t-test                       |                  | Significant | P value |
| Anti-Sp1                     | Anti-Sp1 IR      | *           | 0.0174  |
| Figure 7c                    |                  |             |         |
| t-test                       |                  | Significant | P value |
| shControl IR-S               | shArl8b #m1 IR-S | *           | 0.0207  |
| Figure 7e                    |                  |             |         |
| t-test                       |                  | Significant | P value |
| shControl IR-S               | shArl8b #m1 IR-S | *           | 0.0321  |

| Figure 7h      |                  |             |                |
|----------------|------------------|-------------|----------------|
| <i>t</i> -test |                  | Significant | <i>P</i> value |
| shControl IR-S | shArl8b #m1 IR-S | ***         | <0.001         |
