# Supplementary material for: Lysosomal trafficking mediated by Arl8b and BORC promotes invasion of cancer cells that survive radiation
Source: PubMed Central journal article supplement (PMC7591908; doi:10.1038/s42003-020-01339-9), 2020-10-27
Supplement: 42003_2020_1339_MOESM3_ESM.pdf [file 42003_2020_1339_MOESM3_ESM.pdf]

## **Description of Additional Supplementary Files**

File Name: Supplementary Data 1

Description: Source data of main figures
